# Supplementary material
Source: Springer Nature journal article supplement (https://www.springermedizin.de/resource/supplementary/12913_2011_1831_MOESM2_ESM.pdf/9529038)

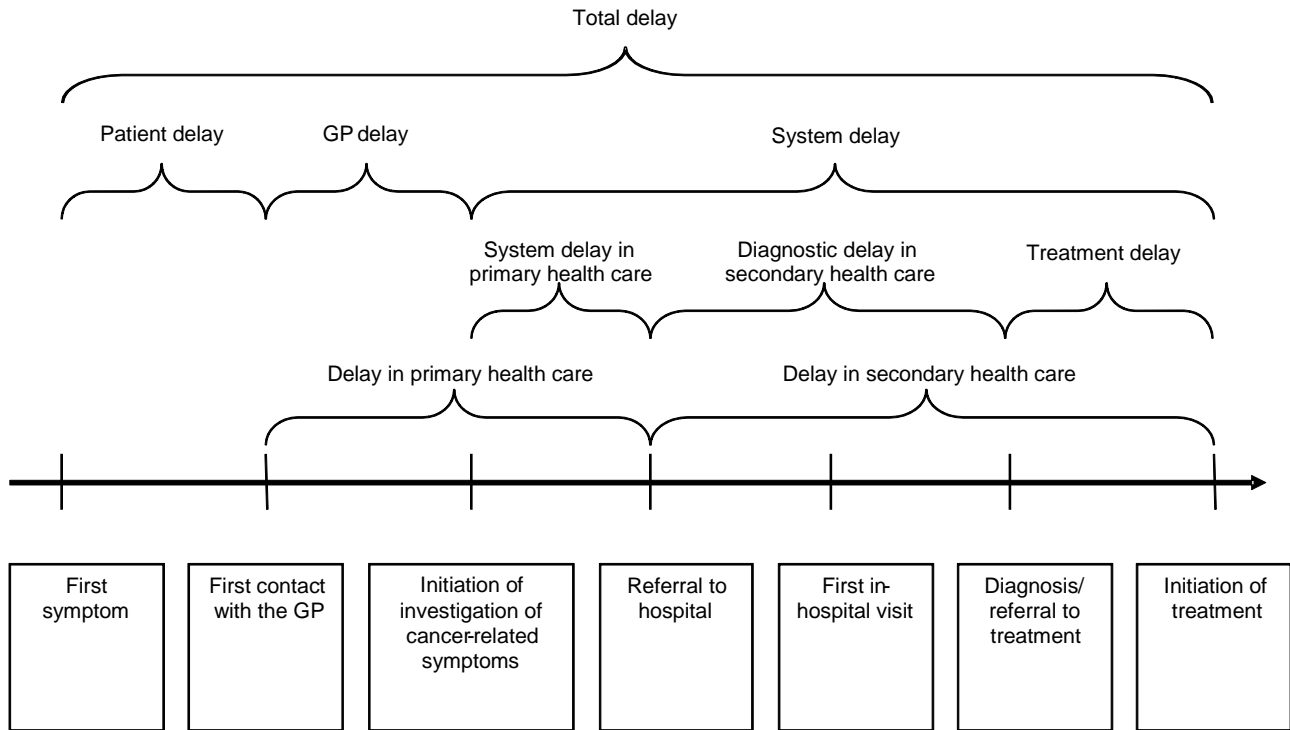

Supplement: MOESM2 [file 9529038]
